# Supplementary material for: Transition metal-coordinated graphitic carbon nitride dots as a sensitive and facile fluorescent probe for β-amyloid peptide detection
Source: Royal Society of Chemistry journal article supplement (doi:10.1039/c8an01620h), 2018-11-02
Supplement: c8an01620h1.pdf [file c8an01620h1.pdf]

## Supporting Information

### **Transition metal-Coordinated Graphitic Carbon Nitride Dots as a Sensitive and Facile Fluorescence probe for $\beta$ -Amyloid Peptide detection**

Yin Zhang,<sup>a,†</sup> Si Meng,<sup>a,†</sup> Jinhua Ding,<sup>a</sup> Qiwen Peng,<sup>a</sup> Yanyan Yu<sup>a,b\*</sup>

<sup>†</sup> Jiangsu Key Laboratory of New Drug Research and Clinical Pharmacy, Xuzhou Medical University, 209 Tongshan Road, Xuzhou 221004, Jiangsu, P.R.China

<sup>‡</sup> Department of Pharmaceutical Analysis, School of Pharmacy, Xuzhou Medical University, 209 Tongshan Road, Xuzhou 221004, Jiangsu, P.R.China

<sup>†</sup> These authors contributed equally to this work.

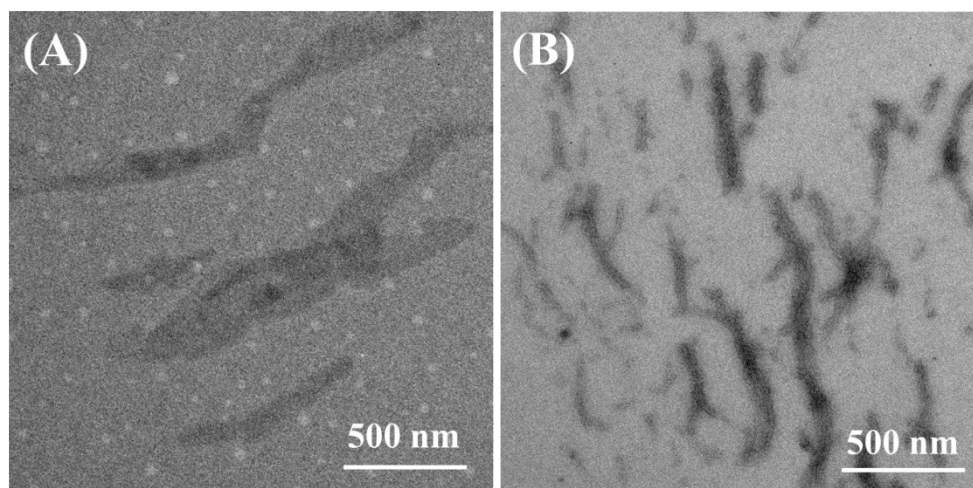

**Fig. S1** TEM images of A $\beta_{1-42}$  species incubated for one (A) and three days at 37°C.

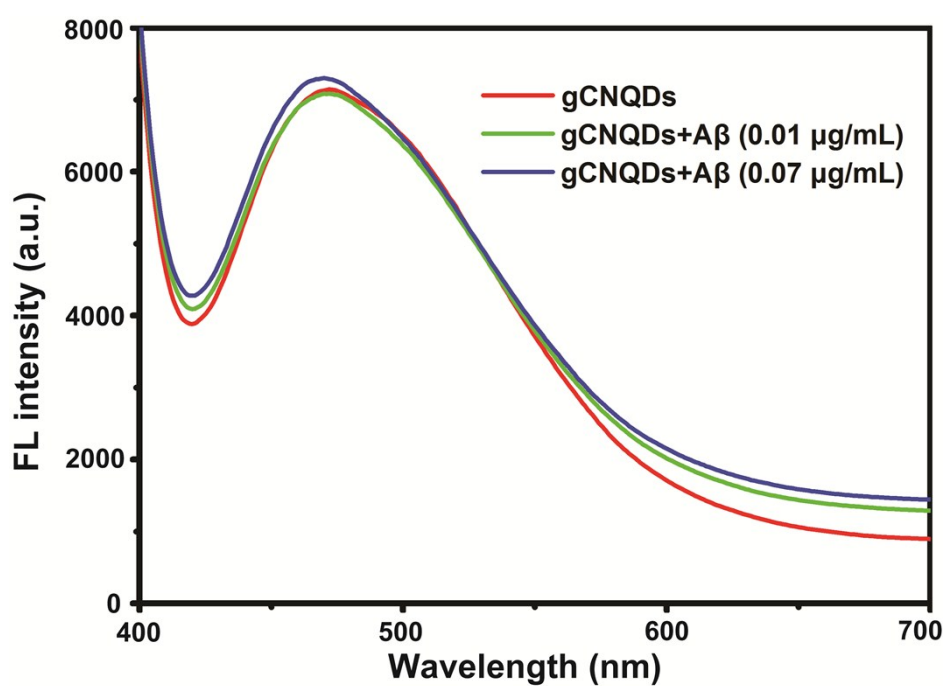

**Fig. S2** Fluorescence responses of gCNQDs upon continuous additions of A $\beta_{1-42}$  in the absence of Cu<sup>2+</sup>.

**Table S1.** Results of detection of A $\beta_{1-42}$  in cortex and hippocampus homogenates from AD rats by the present fluorescent method (Mean  $\pm$  SD, n=3).

| Samples        | Added<br>( $\mu\text{g/mL}$ ) | Detected<br>( $\mu\text{g/mL}$ ) | Recovery<br>(%) | RSD<br>(n = 3) |
|----------------|-------------------------------|----------------------------------|-----------------|----------------|
| AD cortex      | 0.012                         | 0.010                            | 83.3            | 7.7            |
|                | 0.020                         | 0.019                            | 95.0            | 5.5            |
|                | 0.040                         | 0.039                            | 97.5            | 6.5            |
| AD hippocampus | 0.015                         | 0.013                            | 80.0            | 2.5            |
|                | 0.03                          | 0.031                            | 100.0           | 5.9            |
|                | 0.05                          | 0.056                            | 112.0           | 8.1            |
